# Supplementary material for: Integrated bioinformatics analysis of As, Au, Cd, Pb and Cu heavy metal responsive marker genes through Arabidopsis thaliana GEO datasets
Source: PeerJ. 2019 Mar 18;7:e6495. doi: 10.7717/peerj.6495 (PMC6428040; doi:10.7717/peerj.6495)
Supplement: Table S3 [file peerj-07-6495-s003.xlsx]

## Sheet: Sheet1
TABLE S2 Information of input-log2FC for the 168 DEGs filtered by the analysis of RRA (|log2FC| ≥ 1, P value < 0.05 ).
ID	GSE129245	GSE31977-a	GSE129245-b	GSE129245-c	GSE104916-b	GSE22114-a	GSE49037-a	GSE49037-b	GSE6533-a	GSE31977-b	GSE19245-d	GSE104916-b	GSE94314-a	GSE90701-a	GSE65333-b	GSE31977-c	GSE90701-b	GSE94314-b	GSE46958-a
AT3G46270	-0.600139	6.05362	-0.115972	1.10889	NA	-0.692056	1.70638	0.180278	2.37991	5.96359	-0.0289584	-0.0826223	1.05372	1.02675	-0.0830157	1.00084	1.78429	0.704937	3.23369
ATCSLB05	1.87	0.755451	-0.0114579	1.77854	NA	-1.04873	NA	0.686111	3.09504	0.365282	-0.0425698	NA	2.44125	NA	0.180775	0.694511	NA	2.41044	3.96029
AT3G19030	0.835416	1.93941	-0.0573616	1.04312	0.199462	-0.43511	-1.21517	1.9925	1.70923	1.27986	-0.0884728	-0.0948759	1.25925	0.597172	0.28839	1.62763	0.407968	0.90575	2.3249
COL9	3.76278	0.888599	2.48528	2.53347	NA	0.163856	NA	-0.331111	-0.219156	0.705028	2.24847	NA	-0.343	NA	0.0494655	0.219182	NA	-0.272344	-0.14352
BCAT4	0.723473	3.54163	-0.490417	2.30806	NA	-1.94605	NA	0.885277	1.55445	3.45443	-0.586319	NA	1.53003	NA	0.170395	2.75548	NA	2.61475	2.95147
ELF4	4.2009	0.541473	0.908332	4.42528	NA	-0.573954	NA	1.00444	1.81176	-0.0924452	2.71111	NA	NA	NA	-0.638755	-0.472014	NA	NA	0.752956
CYP83A1	0.756389	7.33119	-0.254237	2.61826	NA	-3.21438	NA	0.851528	2.05999	6.19984	-0.319444	NA	1.75919	NA	0.0647657	2.31105	NA	2.669	3.60365
AT1G76800	1.13937	1.72862	1.40208	2.17785	0.868457	-0.815496	2.50605	0.624445	1.19126	1.80417	0.0728476	-0.235746	2.67944	-0.0407517	0.00316513	0.233798	-0.0206664	4.18328	0.475637
AT1G61740	1.54382	2.5949	1.30986	1.13368	-0.185185	-0.341212	-0.0879754	0.56986	1.7873	2.38246	0.734236	0.3235	0.593562	0.0467801	0.323035	2.28079	0.506395	0.710313	-0.0910259
CLE6	1.71326	1.56511	-0.148542	1.2441	NA	-0.907849	NA	0.035833	3.21167	1.82578	-0.00583331	NA	2.24519	NA	-0.258938	1.71916	NA	2.90419	1.28805
AT4G01440	1.21139	3.16732	0.0749998	1.22799	0.154295	-0.188803	1.51153	0.252222	-0.433274	3.94702	0.0994444	0.195195	0.0203748	0.170288	0.0581429	0.435064	-0.464243	0.438687	0.867305
AT1G72200	0.0770128	2.1322	-0.109931	0.0873617	0.136161	-0.48554	2.58117	2.24167	2.89991	1.9819	-0.4425	0.238392	1.15106	-0.175781	-0.441931	1.49637	0.419987	1.64188	3.9159
MOT1	1.14264	0.774071	0.464514	2.32667	NA	-0.900672	NA	0.583333	4.01769	0.731108	0.0359023	NA	3.11975	NA	0.522416	1.26867	NA	1.83706	2.38876
AT5G52790	1.05701	6.05408	-0.00673623	1.68069	-1.02482	-0.674955	0.210204	-0.136389	1.78061	7.54296	0.0673613	0.231646	1.38628	-0.601509	-0.0892199	1.95923	0.308458	2.03363	0.562415
AT4G40070	0.490694	2.59614	-0.140417	0.364166	-0.197789	-0.965502	-0.265974	0.31625	2.1057	2.63383	0.166875	-0.0786364	1.79762	0.241561	0.113985	2.8258	1.49716	1.265	1.86458
AT4G25250	-1.46083	3.45253	-0.123681	2.45083	NA	0.0583402	3.51111	3.44319	3.18691	1.63409	0.0549299	-0.247866	0.751312	-0.0183768	-0.0428923	1.19887	-0.242098	0.965375	4.32127
EXGT-A1	0.0966676	1.22461	2.01667	1.16014	NA	0.0669541	NA	0.336527	0.996775	1.68107	3.25799	NA	1.30638	NA	-0.0939198	0.0208949	NA	1.74287	2.23392
NIA1	0.639722	2.37724	0.0107642	0.49861	NA	-0.372925	NA	3.65208	2.4663	2.17752	0.334236	NA	1.531	NA	0.289963	1.29102	NA	2.14922	-0.86219
AT5G19970	-0.60507	6.43649	-0.127431	0.52507	-0.278998	-0.503481	1.81989	0.208055	2.372	5.41795	-0.139167	0.231049	2.03269	-0.157959	0.65094	4.05696	0.439335	1.97944	4.77223
CYP735A2	-0.111736	4.64547	0.0347223	1.14278	NA	-0.399943	NA	0.199167	1.89551	3.63425	-0.156042	NA	2.0415	NA	0.248633	3.82346	NA	2.26947	3.79632
AT3G59370	0.409653	0.841435	-0.062639	1.48847	0.866805	-1.26747	1.01299	0.914444	2.80275	0.679309	-0.0083331	-0.258633	2.35412	-0.14216	-0.201157	0.340881	-0.143574	2.53463	4.20094
AT3G25790	-0.136806	3.49858	0.0652777	0.200209	NA	0.169443	1.88459	2.86167	1.73986	3.05338	-0.0788194	-0.0249091	1.63744	0.171893	-0.155265	1.39315	0.479727	1.44588	1.78114
PIP2;4	0.6125	1.93141	0.0606941	1.43201	NA	-0.582709	NA	1.68736	2.5662	1.4681	-0.0447225	NA	1.71769	NA	-0.161381	1.0394	NA	2.96359	3.59708
AT4G16447	0.857917	1.28928	0.459305	1.11826	-0.096357	-0.166736	1.24274	1.07833	1.82016	1.25007	1.25785	0.268774	0.345156	0.223585	0.110847	0.104829	-0.0548372	0.371	0.322387
AT1G22500	0.704028	4.34994	-0.655973	0.0847916	-0.0326642	-0.543209	1.01812	1.22431	2.95485	3.54335	-1.42722	0.172788	1.65425	0.0832114	-0.1339	3.03191	0.897381	1.66019	4.22935
NIR1	0.522361	2.16814	0.119305	1.02528	NA	-0.350083	NA	1.45153	0.169752	1.99873	0.614861	NA	1.93966	NA	0.489492	1.28012	NA	1.23187	0.179737
AT5G06610	1.38243	2.10736	0.0797225	1.34236	0.0101361	-0.502443	0.886648	0.590278	0.315897	1.90383	0.762083	-0.0915902	0.420938	0.0735841	-0.125401	1.0896	-0.0807834	0.107	1.00271
CER4	1.36639	2.62807	0.0120833	1.09194	NA	-0.822086	NA	0.835278	3.97399	1.71575	-0.037014	NA	3.55625	NA	0.136319	0.701994	NA	2.48794	1.99799
AT1G12080	0.142431	1.00287	-0.00104205	2.4259	0.191196	-0.872154	0.562223	3.12722	0.839242	0.951744	0.136527	-0.249543	2.44081	-0.0866923	-0.204603	0.543374	-0.0895457	1.89525	1.97321
AT4G31910	0.27993	7.33563	0.179652	1.45056	0.0338258	-0.556581	1.35057	2.43722	0.0446252	5.01533	-0.178403	-0.238345	0.143812	0.129549	-0.316658	1.61194	0.0608382	0.0144374	1.65408
LAX3	-0.507639	1.90412	0.402916	0.444375	NA	-0.0299098	NA	3.06389	0.903893	1.26141	0.345069	NA	1.27737	NA	0.311292	1.0401	NA	1.23819	1.39109
AT1G33340	1.03813	1.41903	1.08875	1.12042	-0.177985	-0.513289	-0.0317776	0.0183334	0.74958	1.44784	1.02465	0.45989	1.19388	-0.172821	0.782468	0.798834	-0.228067	0.9725	-0.329213
LCR69	1.53465	2.30542	-0.213472	1.17181	NA	0.111514	NA	0.896111	0.00539965	1.83068	1.64542	NA	0.429124	NA	-0.290889	0.112704	NA	-0.0100002	0.944027
UCC1	1.98674	0.860346	0.219652	1.90215	NA	-0.746175	NA	2.61264	2.01504	0.604479	0.0306944	NA	1.48809	NA	0.0248647	0.854729	NA	1.64338	1.59588
AT1G24800 /// AT1G24881 /// AT1G25055 /// AT1G25150 /// AT1G25211	-0.133056	1.65926	0.354376	-0.0360417	NA	-0.147649	NA	0.353472	NA	1.10874	0.224583	NA	-0.576687	NA	NA	1.3554	NA	-0.0978749	0.143552
ENODL8	-1.07562	1.14989	0.178751	1.1791	NA	0.0106222	NA	1.70292	NA	0.504677	0.0311803	NA	1.69309	NA	NA	1.55194	NA	1.64334	1.83138
GA3OX1	-0.458194	2.29635	-0.147014	0.729236	NA	-0.665574	NA	1.32083	0.719384	1.75121	-0.384653	NA	1.1625	NA	-0.0154365	1.17629	NA	1.74	1.47681
AT4G39070	2.05347	0.891278	-0.0140278	1.72417	-0.6595	0.0860459	0.734028	1.8875	1.20867	1.29891	0.186319	1.41956	0.634125	0.179324	-0.520435	0.15606	-0.477658	0.924781	0.609754
CYP93D1	0.00888899	-0.0555885	-0.132917	-0.168611	NA	-0.28168	NA	-0.00541687	4.14465	-0.0275768	0.0330556	NA	3.2945	NA	-0.0818432	-0.0313293	NA	4.94213	-0.113243
AT1G21440	1.10139	1.14302	-0.676805	1.99813	0.35344	-1.46319	0.225065	0.257639	1.34418	1.74077	-0.840069	-0.218254	1.1085	0.290377	0.0529133	0.841714	0.0468125	1.87844	2.79425
AT4G01140	0.653194	2.01762	0.0392365	1.31264	0.604101	-0.215321	0.560834	-0.0919444	2.25402	1.59517	-0.0240275	-0.0138654	1.91238	-0.229925	-0.637767	0.160247	-0.0067153	1.67744	2.09584
CKX4	-0.161528	0.12383	-0.290069	0.30757	NA	0.0578266	NA	0.850556	3.23754	0.126394	0.104445	NA	1.45769	NA	0.147072	-0.0180684	NA	2.81925	4.22081
AT3G12900	1.31687	0.00241614	0.0608327	1.24	-0.292481	-0.0364632	0.780488	-0.0554166	-0.432547	-0.00218147	-0.00770855	5.63635	-0.240625	1.37876	0.0300111	0.00252322	0.319352	1.34944	5.91385
RVE2	2.38306	-0.523267	3.33042	3.3357	NA	0.53415	NA	-0.18875	0.85529	-0.0743807	1.31993	NA	0.433532	NA	0.135564	1.33608	NA	0.783688	1.11356
AT3G20015	-0.619791	3.90553	0.133959	0.465833	0.0188377	-0.282881	2.44546	1.93556	0.255331	2.80989	0.314166	-0.0293137	-0.347563	-0.246922	-0.164164	1.50674	0.0454597	-0.365438	0.821549
AT1G09750	0.726389	2.48215	0.781735	1.09083	0.173541	-0.770651	0.566945	1.44028	-0.0230815	1.69838	1.3025	-0.189777	1.47237	-0.533781	0.57268	1.6273	0.0534639	2.10175	3.02533
AT2G40900	-0.781527	5.13821	0.01368	-0.0230552	0.376825	-0.0198564	1.45222	1.56	-0.368224	2.4917	-0.0843054	-0.338808	-0.416437	-0.333284	0.274453	1.16241	0.394279	-0.039438	0.225244
AT3G23880	1.77715	1.15139	1.04917	0.0314577	-0.454687	-0.845343	0.771874	0.391944	2.47047	1.1404	0.310695	-0.00254473	0.555125	-0.4251	0.230061	1.88287	-0.0234141	-0.549437	1.90808
PIP1;5	0.631805	1.36136	-0.260695	1.28139	NA	-0.303164	NA	0.804583	1.52763	1.09653	-0.1	NA	1.01944	NA	0.0552311	0.653527	NA	2.05381	3.94389
AGP4	0.0183343	0.983827	-0.0305555	1.68028	NA	-0.0031886	NA	2.58972	3.21679	0.781218	-0.329167	NA	2.31819	NA	-0.229479	0.146844	NA	2.22475	2.09382
AT3G32040	-0.742223	3.40504	0.122499	0.288611	NA	-0.957933	1.3623	1.20667	2.03429	4.67968	-0.0859719	-0.479554	1.2315	-0.156744	0.155747	0.883404	0.592453	1.13831	1.31494
AT2G01900	-0.224861	3.1046	0.214792	-0.433958	NA	-0.104275	0.843181	0.0606945	2.32129	4.06773	-0.0419445	0.358505	0.937187	0.418705	0.0576703	1.16821	0.448527	1.52806	3.51576
AT1G51820	0.000833087	-0.0239687	-0.026111	0.0702777	2.85802	-0.62861	-0.914417	-0.0780558	-0.191883	0.0288875	0.0758332	-1.08746	NA	1.69123	0.121506	0.0336827	1.89623	NA	0.0483318
AIR1	0.160831	0.319509	-0.13868	0.745279	NA	-0.183534	NA	0.707221	3.50649	-0.304242	-0.192153	NA	1.79087	NA	-0.268743	-0.0946377	NA	2.06131	6.93911
AT5G04730	-0.249098	-0.00242983	-0.00826401	0.287223	0.229716	-1.04051	0.490071	0.0866667	2.12	0.00144465	-0.0354166	0.924362	2.10431	-0.033658	-0.0716065	4.05881e-05	-0.184597	2.27681	5.77413
AT5G42860	-0.5425	1.30423	-0.127986	-0.0113892	0.629413	-0.134276	0.571337	1.78694	0.77464	1.05736	0.101597	-0.118361	1.28569	-0.126517	-0.101088	0.445288	0.448348	1.04837	1.52756
BT2	1.96215	3.47038	1.69937	0.370208	NA	0.00831986	NA	-2.21667	0.404912	4.12804	0.827986	NA	0.306438	NA	-0.0900623	2.81894	NA	0.161501	0.176323
CYP71B2	-0.862361	2.98671	0.192986	-0.077847	NA	0.224728	NA	0.609583	3.03576	4.66972	-1.62618	NA	1.43544	NA	0.273821	1.86042	NA	1.88538	4.50778
AT5G26280	0.16757	1.19128	-0.182916	0.504721	-1.00875	0.321055	0.00926604	1.56833	3.41618	0.714696	0.155	-0.338384	1.47337	0.513431	0.0434554	0.338056	1.43413	0.756	2.57611
DIN2	-1.94583	-6.65995	0.336042	-2.22389	NA	1.42915	NA	-5.02583	-3.84129	-6.32767	0.477986	NA	-6.61169	NA	-1.29808	-4.80496	NA	-6.60806	-4.76652
WRKY75	-0.252986	-3.36204	-0.135625	-2.09903	NA	1.93153	NA	-4.40556	-3.01731	-3.50401	0.239236	NA	-3.9715	NA	-1.02332	-1.66874	NA	-5.25341	-3.66007
AT4G15120	0.271389	-3.85596	0.0271531	-1.30396	0.0545982	0.736626	-1.82975	-2.81278	-1.97153	-3.81994	-0.100139	-0.115596	-1.86525	-0.0433407	-0.252707	-1.56589	0.0249104	-1.62328	-2.98395
CYP81F2	-1.22417	-4.62671	-1.77924	-2.79611	NA	2.28723	NA	-1.98375	-3.04948	-5.50741	-0.642985	NA	-1.12081	NA	-0.674344	-2.73637	NA	-3.45556	-4.56743
AT1G73480	-0.204166	-4.06545	-2.36701	-1.06069	-0.259755	0.490502	-1.50002	-4.24889	-0.503099	-3.64533	-1.41458	-0.0293391	-1.59016	-0.579679	0.0819836	-1.61146	0.058217	-1.39366	-1.89093
AT1G72900	-0.0700697	-2.85531	-1.35333	-1.4359	0.133546	1.32825	-0.520225	-1.82167	-0.343352	-3.53827	0.620417	0.0751771	-1.67819	-0.883091	0.078501	-2.63905	-0.107518	-3.59769	-4.38423
PGPS1	0.843818	-2.38328	-1.16792	-1.33681	0.024187	2.19182	-1.97814	-2.57167	-0.95728	-2.53178	0.987639	-0.334148	-1.05	0.250293	-0.490531	-1.22521	-0.260482	-2.58084	-4.05346
AT5G06730	-0.944375	0.232969	-0.0227783	-4.57188	2.35178	0.467871	-0.595802	0.396667	-5.54793	0.215885	0.0996527	-0.154341	-3.50094	-0.138288	-0.330441	0.00164109	-0.100835	-5.31538	-4.22019
AT1G35910	-1.93896	-0.0758985	-0.0730557	-1.94708	-0.223636	0.875313	-1.08948	-0.822222	-1.3431	-0.0752796	0.0418053	-0.266694	-2.56819	0.071228	-0.193761	-0.773929	-0.244761	-3.44634	-2.8186
CYP81D8	-0.395833	-7.25849	0.0236808	-1.65826	NA	1.44448	NA	-4.80264	-2.52809	-6.86154	0.573334	NA	-2.35003	NA	-0.616359	-5.28411	NA	-2.38756	-4.58006
AT3G12320	-3.02875	-0.25085	-1.5259	-2.06785	0.433359	0.567668	0.997057	-0.242361	0.0795411	-0.25533	-2.16042	0.159054	-0.00343823	-0.115172	0.57917	-0.000874926	-0.0876307	0.182937	-0.485522
ATERF6	0.258264	-2.87243	-1.05313	-1.82354	NA	2.14207	NA	-4.89625	-0.908672	-3.18458	-0.0503478	NA	-0.135187	NA	-1.00271	-1.14017	NA	-0.694937	-4.12552
AT1G12200	-0.106251	-2.2307	0.564027	-0.996806	0.31127	0.496503	-0.163488	-0.263333	-3.3841	-1.8172	0.430208	0.318775	-1.95094	0.262314	-0.378736	-1.32265	-0.413946	-4.40019	-2.75964
AT5G25450	-0.611944	-4.57123	0.500625	-0.332708	-0.013026	1.14177	-3.98654	-5.06986	-0.200646	-4.21556	0.228264	-0.367535	0.175812	0.706121	-0.0861444	-1.99945	0.237792	-0.617938	-1.21867
AT4G28460	-0.32743	-3.06193	0.0161801	-0.435417	NA	1.42507	-1.59057	-1.79875	-2.46629	-2.40622	0.0661109	0.105406	-1.75106	0.217171	-0.333206	-1.20053	-0.836989	-3.20712	-4.02615
NILR1	0.00722249	-3.82405	-0.190139	-1.17896	0.114843	0.706548	-1.41171	-2.04014	-2.06115	-4.12101	0.589583	0.146704	-1.46306	0.0577726	-0.638927	-1.95212	0.402313	-2.20981	-3.51806
HSP70	-4.26097	-3.82127	2.10854	-0.953333	NA	1.91373	NA	-4.59444	-0.129118	-3.59835	0.0890973	NA	-0.546562	NA	0.0243637	-2.66837	NA	-0.122875	-1.50061
APRR9	-2.42007	-0.963517	-1.14403	-2.20417	NA	-0.443661	NA	-0.175972	0.940214	0.139121	-1.73347	NA	0.541812	NA	0.892995	-0.619309	NA	0.293188	-0.186855
Fes1A	-1.11521	-4.76683	1.16667	0.0194446	NA	1.37894	NA	-6.15528	NA	-4.15606	0.836389	NA	-0.576407	NA	NA	-2.39797	NA	-0.259562	-2.00621
AT3G02800	0.341528	-4.60048	0.0613891	-0.602014	-0.26289	1.8656	-3.00114	-3.37417	-0.62804	-4.72563	0.404097	0.0857916	-0.990375	0.0392752	-0.225421	-1.54219	-0.135611	-1.35262	-3.51768
AT2G23270	-0.722222	-6.57808	-0.327153	-0.961528	NA	2.24046	-1.63637	-1.59695	-3.50048	-6.94834	-0.158889	-0.0146772	-2.53156	0.0420558	-0.610101	-3.5818	-0.43515	-4.12491	-4.30748
CRK11	0.0778473	-2.78692	0.0584028	-1.36431	NA	1.97924	NA	-2.56931	-2.55011	-2.76431	0.55757	NA	-1.89544	NA	-0.617819	-2.17892	NA	-3.04109	-4.00351
AT3G07090	-1.08861	-2.27856	1.04215	0.0995831	0.150358	0.793384	-0.646883	-2.45861	-0.539428	-1.63096	0.759445	-0.205909	-0.366688	0.436474	-0.0785565	-1.09256	0.226295	-0.600938	-0.569313
AT5G26220	-0.791389	-4.96723	-0.148681	-0.605486	0.195244	1.53627	-2.09226	-2.94222	-2.03678	-3.836	0.572985	0.592169	-0.99475	-0.170639	-0.397832	-6.71205	-1.5715	-0.253094	-1.86445
AT5G05220	0.00965267	-3.69541	0.160486	-0.142639	-0.132816	0.375946	-5.31572	-5.88889	-0.306703	-1.06163	0.150347	NA	NA	-0.316751	-1.24332	-0.0271679	-0.0320807	NA	-1.70443
ATSDI1	-3.17813	-3.74494	0.601944	-2.40076	NA	1.87421	NA	-2.57153	-2.75875	-3.33411	0.364722	NA	-3.94181	NA	-0.782268	-5.33815	NA	-2.94175	-0.40942
ATGSTU4	-0.287292	-3.37949	-0.160972	-0.591875	NA	2.23358	NA	-2.29903	0.0226766	-2.62841	1.2109	NA	-2.87806	NA	0.122472	-2.74574	NA	-3.32519	-5.04988
AT1G61340	0.0809724	-4.15245	-0.211736	-1.02313	-0.0647663	2.74008	-3.38698	-5.47333	-0.515719	-3.60481	0.888542	0.356056	-0.512813	0.199142	-0.0712606	-1.66764	-0.556939	-0.789813	-3.30862
ERF2	-1.39861	-1.55094	-0.646945	-2.76104	NA	1.00027	NA	-0.918889	-1.22429	-2.54207	0.152221	NA	-2.22425	NA	-0.457663	-0.0435808	NA	-3.43037	-3.79034
AT5G64510	-0.259792	-5.34679	0.640764	-1.10174	-0.364338	0.578546	-2.53188	-4.92583	-1.39054	-4.41384	-0.0355557	-0.671464	-1.03625	0.912799	0.0780498	-1.44621	0.736958	-1.82556	-2.10704
ATHSP23.6-MITO	-0.157291	-7.06221	-0.122708	0.127986	NA	2.02218	NA	-5.68403	-0.188102	-5.85517	0.125416	NA	NA	NA	-0.0858375	-4.41032	NA	NA	-1.62207
BCS1	-1.54549	-1.01485	-0.468888	-2.77229	NA	1.99407	NA	-2.62361	-0.720386	-0.61648	1.2075	NA	-1.70975	NA	-0.34313	-2.5169	NA	-2.70381	-3.69861
MBF1C	-1.7109	-4.05172	1.11778	0.831458	NA	2.1134	NA	-5.40778	-0.0684943	-3.71313	0.550625	NA	-1.14156	NA	0.00308384	-2.06033	NA	-0.616532	-0.924159
ATGSTF6	-0.991458	-1.7801	-0.07375	-2.22459	NA	0.787073	NA	-1.12222	-4.07495	-2.01648	0.435278	NA	-1.03166	NA	-0.209721	-1.57938	NA	-2.70894	-3.52213
AT3G62550	0.184375	-0.00514185	-0.0863893	0.292153	-0.332096	-0.0550653	3.0899	0.55	-0.625363	-0.00950527	-0.935624	0.356343	NA	-1.90782	-1.33922	0.0887609	-1.58721	NA	0.520442
AT3G09440	-1.80312	-1.84282	1.14597	-0.389722	0.227625	0.550066	-0.0795893	-1.77806	-0.0684733	-1.52631	1.04437	-0.0358308	-0.879937	0.815989	0.0998167	-1.2402	0.0363641	-1.5635	-0.710179
ZIFL1	-1.27215	-2.12891	-0.282223	-1.44806	NA	0.794637	NA	-2.22722	-2.17379	-2.09279	-0.205624	NA	-1.30481	NA	-0.321806	-2.18696	NA	-2.14356	-2.53575
AT1G12030	-0.115	-2.20069	-0.209167	0.128333	0.193021	1.56976	-0.795354	-2.63083	-1.69907	-1.77821	-0.0881254	0	-1.12788	0.466223	-1.1925	-3.74373	-0.624069	-2.41891	-0.172046
AT5G05340	-0.424792	-0.00603879	0.0725696	-3.57458	1.32962	1.06194	0.210173	-0.648472	-4.22621	0.00225124	-0.207083	1.13665	-3.55647	0.863417	-1.00132	-0.0102956	0.740067	-5.79075	-3.27395
PXMT1	-0.187361	-2.78415	-0.574653	-0.683681	NA	0.805265	NA	-2.78611	-3.93656	-3.10511	0.0645834	NA	-2.33769	NA	-0.635045	-2.49695	NA	-4.5595	-5.59089
AT5G02230	1.59986	-2.64301	0.369167	0.0870834	0.140716	0.648902	-1.6832	-3.1125	-0.992322	-2.97211	-1.78556	-0.266374	-1.28425	-0.38517	-0.155959	-1.7702	0.0594416	-1.29513	-3.06089
AT5G02490	-1.01181	-1.83458	1.65861	-0.757014	0.140797	0.487821	-1.28098	-1.4575	-1.50312	-1.0635	1.86632	-0.241139	-0.54025	0.66346	-0.130901	-1.49556	0.110122	-1.93294	-1.51959
ACS6	-1.14375	-2.36997	-1.21132	-2.67111	NA	2.34391	NA	-2.10639	-0.413749	-2.53604	-0.541667	NA	-0.513687	NA	0.103558	-0.74866	NA	-1.50163	-3.22698
GLIP1	-0.0681944	-1.1264	-0.0142359	-0.285417	NA	-0.80076	NA	-1.93389	-4.1244	-0.0909765	-0.0138889	NA	-1.26056	NA	-0.332212	-0.0493865	NA	-4.69597	-6.13847
AT4G16260	-0.501458	2.18723	-2.20382	-2.44896	-0.031291	-0.0832079	0.138342	1.20722	-3.59492	2.58503	-1.50806	-0.367061	-1.46194	0.231093	-0.936908	-0.176097	0.990765	-2.34588	-1.22599
AT5G13200	0.189445	-2.24132	0.0429164	0.221736	-0.31791	0.350715	-2.0199	-1.56986	-1.48952	-1.30274	0.903263	0.311711	-1.05025	0.0434508	-0.407547	-1.11143	0.0520115	-3.56119	-2.9055
AT2G18670 /// AT2G18680	0.399722	-3.76135	-0.182153	0.14632	NA	1.0291	NA	-4.10972	NA	-2.15412	0.904722	NA	-1.50375	NA	NA	-0.384165	NA	-1.92538	-3.28599
AT5G39110 /// AT5G39120 /// AT5G39150 /// AT5G39180	-2.01368	0.964505	-0.0125004	-3.7734	NA	0.379232	NA	0.588611	NA	1.03166	0.244028	NA	-4.08619	NA	NA	-0.118089	NA	-5.00697	-3.46245
AT5G20820	-1.91014	-0.846866	0.0613196	-2.26042	0.877775	0.393866	-0.304898	0.0219446	-1.12731	-1.34385	-0.13743	-0.0299802	-3.27587	0.32283	0.446489	1.48748	-0.399778	-3.393	-0.50013
AT5G64170	-3.39375	-1.79749	-0.594097	-2.19889	0.126351	0.324251	0.0226113	-1.51472	-0.400282	-1.11731	-1.78042	0.242025	-0.613188	0.0214953	0.0600702	-0.530538	0.0387044	-0.00159383	-0.12165
AT4G28350	-0.223611	-4.31464	-0.156875	0.0172222	0.0453823	0.935798	-1.52092	-2.39556	-1.46402	-4.51331	-0.00423654	0.510558	NA	-0.268394	-0.134153	-1.44273	0.0167451	NA	-3.10318
AT3G47540	-0.924515	-1.37025	-0.533541	-1.22833	0.291224	0.317388	-0.405835	-0.379723	-1.22714	-1.23324	-0.430486	-0.522481	-1.13894	0.275122	-0.19655	-1.39364	0.264767	-2.44769	-2.85642
AT2G19310	-1.34021	-5.32537	1.05972	-0.418819	-0.470345	0.658354	-1.18352	-1.6475	-0.514896	-4.94192	0.451042	-0.172442	-0.352062	0.375989	0.125548	-2.62654	0.134604	-0.257563	-0.187618
CSLE1	-0.0184027	-0.779279	-0.2775	-1.01493	NA	0.0995725	NA	-0.732499	NA	-0.646008	0.146667	NA	-2.362	NA	NA	-1.6468	NA	-2.68387	-2.91459
CYP710A1	0.588333	-3.64689	-0.0540273	0.359098	NA	0.0898242	NA	-4.46542	-0.0419377	-3.00491	0.171181	NA	0.285219	NA	0.102971	-1.15068	NA	0.268438	-3.24126
WRKY45	-0.721805	-2.60584	-0.0177775	-1.88069	NA	0.335342	NA	-1.25	-3.64043	-2.32138	-0.580555	NA	-3.86663	NA	-0.741149	-1.57482	NA	-4.61187	-3.76148
EAP1	0.907014	-3.07154	-0.781736	-0.972916	0.107393	2.03499	-1.00203	-2.07042	-0.574896	-3.14413	-0.111111	-0.0204549	-0.561938	0.166737	-0.464633	-1.34575	-0.0597777	-2.07575	-3.49713
CYP706A2	-0.366112	-6.18858	-0.7525	-1.96736	NA	0.784123	NA	-0.81111	-1.70988	-6.75863	-0.0765279	NA	-0.306656	NA	-0.182792	-3.29496	NA	-2.12322	-4.62663
AT4G19810	-1.25486	3.14667	0.624652	-1.09562	-0.850822	0.338279	0.112789	0.65611	-3.73549	4.21017	0.710417	-0.00186394	-2.47144	-0.274622	-0.612621	-1.78023	0.610787	-4.06231	-0.768001
AT4G04330	-0.265556	-0.0548693	-0.577084	0.15125	-0.633421	0.964542	0.5945	0.389445	-0.245009	-0.0363011	-0.0205555	-0.727986	NA	-1.22352	0.115599	-0.013958	-1.18665	NA	0.821406
AT2G21640	-0.0375696	-4.53283	-0.103333	-0.194722	0.0485487	-0.416165	-1.46298	-3.95667	-0.694977	-2.7623	-0.00715235	-0.337877	-2.38937	0.769086	-0.0955666	-3.98709	-0.0888681	-1.47356	-0.892389
ATHSFA2	-0.317222	-5.69112	1.20437	0.0487497	NA	3.1849	NA	-5.87278	0.279826	-4.1683	1.00667	NA	NA	NA	-0.139734	-3.1093	NA	NA	-1.11459
AT1G72940	-0.0652774	-2.04824	-0.963542	-0.577847	-0.207026	1.25302	-1.32876	-0.594167	-1.79301	-2.07864	0.972986	0.147321	-0.714156	0.0858831	-0.0107974	-1.86827	0.649199	-1.64363	-2.67898
AT2G35730	0.814236	-2.6053	-0.155625	-0.553959	-1.07273	0.459772	-1.33791	-1.98361	-0.932555	-2.12604	0.0222915	-0.493611	-1.67431	0.302806	-0.86523	-1.4803	-0.00459862	-2.35637	-2.09476
AT4G37290	0.0697225	-6.20114	-0.286527	0.047778	0.579305	2.07111	-1.42263	-2.66111	-3.13356	-6.61329	-0.118125	1.11289	-0.316	0.919715	-0.27824	-4.24573	-0.438503	-1.74256	-5.25105
MYB51	0.946389	-2.84458	-1.15958	-1.47326	NA	1.43696	NA	-1.42111	0.035934	-3.975	0.0529168	NA	-0.71925	NA	-0.757531	-1.30164	NA	-1.96413	-3.47095
AT1G60750	-0.0590276	-4.63017	0.0905557	-0.229445	NA	0.183215	-1.91574	-4.18	-1.93216	-4.06325	-0.00861104	1.10908	NA	0.132376	-0.0775399	-2.80977	-0.111817	NA	-3.56105
AT5G20910	-0.036459	-2.66083	-0.0557641	-0.694376	-0.0992946	0.437545	-0.34858	-2.94514	-0.504712	-2.02355	-0.0431247	0.0421313	-0.593375	0.0131645	-0.112807	-1.41541	-0.171041	-0.638125	-1.78897
AT1G72060	1.04861	-5.17013	0.33243	0.338611	2.69385	0.293142	-0.531026	-1.35625	-1.66894	-5.50561	-0.165696	-0.937607	-1.20697	-0.0314784	-1.16187	-0.483485	0.563799	-0.403813	-0.84323
AR781	0.499167	-1.68223	-0.922431	-1.59493	NA	2.27355	NA	-3.53958	-0.701705	-2.18037	-0.439514	NA	-1.53081	NA	-0.000265065	-0.635193	NA	-2.40406	-3.68108
ATBCB	0.514861	-3.30695	0.324028	-1.49	NA	2.05587	NA	-0.633196	-3.3944	-3.85405	0.841667	NA	-0.775781	NA	-0.421454	-0.464205	NA	-2.31825	-4.88553
ABA1	-1.46778	0.24114	-1.06021	-1.01556	NA	0.0328941	NA	0.160001	-0.0336419	0.214103	-1.03868	NA	0.170125	NA	0.339524	0.444638	NA	0.299	0.621677
ORG1	-0.559028	-0.272429	-1.68125	-0.391458	NA	0.0731572	NA	-0.793889	0.202517	-0.789952	-1.56153	NA	-2.59444	NA	-0.613514	-0.86247	NA	-2.05069	1.04105
YLS9	0.8125	-0.216777	0.205903	-1.55965	NA	1.39211	NA	-1.44931	-2.02181	-0.0721085	0.690139	NA	-2.38163	NA	-0.45133	1.30997	NA	-4.1455	-5.41832
AT4G15420	-0.447292	-3.67551	0.0211809	0.144306	0.071464	0.631054	-1.9339	-4.10861	-0.135972	-3.28405	-0.221596	0.0743735	-0.147687	-0.0126991	-0.166001	-1.75203	-0.305103	-0.199125	-1.18564
AT3G09405	-0.44625	-3.76877	-0.339999	-0.94493	-0.236775	0.260032	-2.59006	-3.16847	-1.75104	-3.40283	-0.00979148	0.285563	0.312625	0.00989866	-0.0407841	-2.78432	0.203687	-1.47	-4.10801
AT5G06760	NA	NA	NA	NA	1.23823	NA	0.0375875	NA	-2.87307	NA	NA	-0.353994	NA	-1.2017	-0.409483	NA	-1.21133	NA	NA
AT5G53970	-1.07958	-2.39961	-0.450139	-1.06569	0.296624	-0.634828	0.699285	-0.766805	-0.775887	-2.04531	-1.39188	0.517609	-1.112	0.237823	0.128996	-1.53328	0.0489669	-1.17762	-0.744553
ICL	-0.312222	-1.62494	0.111736	-0.638749	NA	0.145008	NA	-4.58278	-0.0469661	-0.302781	-0.0536803	NA	-2.36431	NA	-0.0192652	0.642759	NA	-2.70728	-3.45864
AT5G51440	-0.917986	-4.07913	0.479861	-0.0461808	0.0279293	1.60995	-4.21016	-7.21708	-0.519701	-3.70773	0.130278	-0.436832	-0.696562	1.00152	-0.162909	-1.99256	0.29741	-1.04475	-1.13079
BCA3	-0.230903	-2.46729	0.230902	-0.969028	NA	1.35354	NA	-2.95208	-0.0952602	-3.10796	-0.13618	NA	-6.24116	NA	0.010702	-3.00809	NA	-4.56713	-4.43246
SBT3.5	-0.192917	-3.54573	0.567986	-0.0191667	NA	-0.0813461	NA	-3.01111	-0.70467	-3.15522	-0.0288194	NA	-1.30275	NA	-0.298871	-1.94095	NA	-2.58769	-2.70316
AT4G39830	0.101389	-0.394699	-0.110764	-1.93576	-0.412798	0.937889	-1.60328	-0.640556	-2.4431	-0.17039	0.863194	-0.137441	-1.44475	-0.12016	-0.417984	-1.47583	-0.194782	-2.12288	-2.05833
MYB15	-0.230972	-1.03371	-0.535764	-2.37208	NA	2.35633	NA	-0.932917	-1.01778	-2.43861	0.915834	NA	-1.61706	NA	0.116637	0.310879	NA	-2.82169	-4.604
AT5G52750	-0.963195	-4.50117	-0.842361	-3.64132	0.146862	2.29026	-0.600078	-0.792777	-1.11617	-4.91634	0.927847	-0.508974	-1.03844	-0.0142045	-0.499477	-1.40972	0.0506189	-2.84212	-3.40978
AAC3	-0.388333	-3.98402	-0.374722	-0.462222	NA	0.438362	NA	-3.04306	-1.95767	-3.6465	-0.370487	NA	-1.845	NA	-0.197557	-1.51065	NA	-1.26219	-1.9212
AT3G48510	-0.083958	-0.0330188	-0.0952776	0.155139	0.260994	0.255879	-0.669542	-0.266945	-2.67079	0.00882094	0.152222	-1.4985	-0.338281	-1.52592	-0.0779091	0.133841	-0.866689	-0.371	-0.474859
HSP17.4	-1.18931	-7.38904	0.0393749	-0.850069	NA	2.35176	NA	-8.05361	NA	-7.55961	-0.378194	NA	0.250688	NA	NA	-6.18118	NA	0.00118756	-5.35236
AT5G42830	0.417291	-1.21164	-0.306459	-0.72986	-0.0318579	0.223995	-0.382258	-2.58708	-1.02693	-1.54617	0.0927775	-0.292106	-1.69281	0.598024	-0.119198	-1.6831	0.389916	-2.61862	-2.82318
AT5G48000	NA	NA	NA	NA	-4.48588	NA	0.254383	NA	NA	NA	NA	-1.07673	NA	-0.5749	NA	NA	0.129919	NA	NA
AT1G71140	0.232361	-0.0566574	-0.45757	-0.227153	-0.0874582	0.745661	0.0585873	-1.01889	-5.36214	-0.130378	-0.0447225	1.00706	-3.84053	0.0105829	0.103324	-0.0047516	0.0352077	-4.28544	-3.31802
AtPP2-A11	-0.166458	-1.41578	-0.443194	-1.21167	NA	0.727743	NA	-0.917777	0.611038	-2.03163	-1.71861	NA	-1.153	NA	0.173044	-0.627298	NA	-1.6505	-2.44769
WRKY33	0.684374	-2.27134	-1.4634	-1.36201	NA	1.73719	NA	-3.23667	0.0645145	-2.63237	0.0562505	NA	-0.509	NA	-0.429808	-1.18081	NA	-1.45356	-3.09162
SULTR1;1	-2.22493	-0.850788	0.0312501	-3.2666	NA	0.588128	NA	0.0297221	3.15897	-0.100099	0.0111108	NA	-1.48012	NA	0.0404286	-1.09141	NA	-1.7325	1.69977
AT3G50910	-0.588889	-2.56565	0.932847	-0.320764	0.194072	0.153731	-0.85831	-2.60056	-1.67283	-2.82939	0.956945	-0.161271	-0.75275	0.193385	-0.371234	-1.29767	0.0333266	-1.43141	-1.86647
AT2G36460	-0.515625	-2.69707	0.223473	-0.462084	-0.144116	0.153674	-1.39717	-2.37639	-0.160607	-1.69939	0.404166	-0.0657344	-0.75025	0.274254	0.0995203	-1.6481	0.193482	-0.0140305	-0.637987
AT2G48090	-0.453264	0.25584	-0.0375695	-2.26396	0.336137	0.372305	-0.195426	0.285277	-2.464	-0.0110318	-0.0277085	-0.0997925	-2.97869	0.0332055	-0.351461	-1.34334	-0.174716	-2.60066	-0.960378
CEJ1	0.436042	-1.66897	-0.83882	-0.581528	NA	0.773698	NA	-2.76306	-0.38928	-1.34996	-0.177361	NA	-1.70875	NA	-0.684445	-1.42591	NA	-1.96988	-2.49476
CHI	-0.764097	-2.76602	0.291041	-0.957778	NA	0.282228	NA	-0.925	NA	-2.60782	0.4825	NA	-2.57719	NA	NA	-1.61066	NA	-3.73231	-2.92105
AT1G14550	0.143334	-3.12731	0.12875	0.155	NA	1.48204	-4.75251	-1.54083	-2.09212	-2.97977	0.222084	0.116253	1.41222	0.529617	0.0510235	-1.13619	-0.0226052	-1.08788	-5.59572
PAP20	-0.00861094	-0.0268305	-0.190487	-0.102292	NA	0.574577	NA	0.175	-4.22939	-0.0103592	0.135695	NA	-3.20181	NA	-0.714676	-0.020955	NA	-0.923688	-0.218268
AT5G14730	0.0226386	-1.4353	-0.270624	-0.654097	-0.359997	1.30274	-2.09302	-2.12458	-1.22934	-1.09645	-0.467153	-0.26068	-1.09069	0.743839	0.0259264	-2.23565	0.0626016	-2.52437	-2.74954
NAPRT2	-0.250764	-2.36662	-0.261111	-1.1334	NA	0.481151	NA	-1.32556	-1.08642	-2.04824	-0.125764	NA	-0.769125	NA	0.0801312	-1.65621	NA	-1.52162	-1.8669
CRK10	-0.906597	-2.34543	0.0598617	-2.05861	NA	2.03047	NA	-0.684167	-1.93206	-2.69849	0.624653	NA	-1.61938	NA	-0.239971	0.664168	NA	-2.61612	-3.29759
GRX480	-0.240417	-1.08798	-0.600833	0.0246524	NA	1.30322	NA	-1.50097	-2.67441	-0.918816	1.49049	NA	-0.973687	NA	-0.612895	-1.70291	NA	-2.17709	-3.42719
AT5G39580	3.31951	-2.04682	0.00875039	-0.586181	-0.636414	1.81693	-3.45189	-3.43139	-1.358	-3.09398	-0.0337501	0.0781334	-1.278	0.480116	-0.516594	0.563325	0.188965	-2.45194	-5.49447
DMP1	-1.14937	-0.00849382	-0.323402	-0.677917	NA	1.0954	NA	0.286667	NA	-0.00796148	1.10806	NA	-4.85187	NA	NA	-0.0124294	NA	-5.15506	-3.68586
AT3G12510	0.186389	-2.89887	0.168472	-0.563472	0.0964822	0.740634	-1.2055	-2.05611	-2.04917	-2.50692	0.222152	0.330684	-0.720156	-0.095571	-0.833299	-1.15339	-0.0371103	-2.06716	-1.02447
AT3G48450	0.468125	-3.6732	0.173751	-1.20055	0.14618	0.449762	-1.82584	-0.86	-2.98749	-2.75253	-0.375625	0.612642	0.473625	0.149304	-0.449474	-0.842713	0.208736	-1.28734	-2.21046
