# Supplementary material for: Integrated bioinformatics analysis of As, Au, Cd, Pb and Cu heavy metal responsive marker genes through Arabidopsis thaliana GEO datasets
Source: PeerJ. 2019 Mar 18;7:e6495. doi: 10.7717/peerj.6495 (PMC6428040; doi:10.7717/peerj.6495)
Supplement: Table S4 [file peerj-07-6495-s004.xlsx]

## Sheet: Sheet1
TABLE S3 Information of P-value for the 168 DEGs filtered by the analysis of RRA (|log2FC| ≥ 1, P value < 0.05 ).
ID	GSE129245	GSE31977-a	GSE129245-b	GSE129245-c	GSE104916-b	GSE22114-a	GSE49037-a	GSE49037-b	GSE6533-a	GSE31977-b	GSE19245-d	GSE104916-b	GSE94314-a	GSE90701-a	GSE65333-b	GSE31977-c	GSE90701-b	GSE94314-b	GSE46958-a
AT4G39830	1	1	1	3.10675e-05	1	1	0.00132537	1	1.68456e-09	1	1	1	0.000373805	1	1	0.000580675	1	1.10808e-08	1.59767e-06
MYB15	1	0.00884443	1	1.72307e-06	1	0.0201613	1	1	3.09083e-05	0.0003205	1	1	0.00176222	1	1	1	1	8.06428e-10	1.06472e-09
AT4G25250	0.00694121	6.65209e-05	1	0.000307032	1	1	2.31661e-07	2	4.96347e-09	0.000967741	1	1	1	1	1	0.00085304	1	1	4.52331e-07
PXMT1	1	0.000316187	1	1	1	1	1	1	4.19046e-11	0.000966333	1	1	0.000682039	1	1	9.21743e-05	1	1.1603e-11	3.19784e-08
SULTR1;1	4.26393e-06	1	1	1.81697e-06	1	1	1	1	3.45237e-09	1	1	1	0.00035759	1	1	0.000195009	1	9.40896e-08	0.00144102
CEJ1	1	0.000615209	1	1	1	1	1	9	1	0.00264221	1	1	0.000192017	1	1	0.000133898	1	2.61343e-08	1.52479e-06
BCAT4	1	1.39225e-05	1	1.9751e-05	1	1	1	1	2.12942e-06	3.76182e-06	1	1	0.000533141	1	1	0.00120842	1	1.32214e-09	5.55805e-08
MYB51	1	0.000146569	0	4.04873e-05	1	1	1	1	1	5.99502e-05	1	1	1	1	1	0.00265857	1	2.70773e-08	8.92542e-08
AT5G53970	0.00652736	1.47418e-05	1	0.00686912	1	1	1	1	1	0.000507476	0.000628288	1	0.0048693	1	1	0.00014171	1	6.9531e-06	1
AT4G37290	1	4.51049e-05	1	1	1	1	0.0049023	1	6.09641e-09	3.53762e-05	1	0	1	1	1	4.99572e-06	1	2.24111e-06	2.55025e-08
AT1G72060	1	7.02686e-07	1	1	0.043317	1	1	7	4.46382e-06	5.92663e-08	1	1	0.0032495	1	0	1	1	1	1
CER4	9.25992e-06	1	1	0.00256374	1	1	1	1	2.18333e-09	1	1	1	0.000106695	1	1	1	1	1.27484e-07	0.00109669
BT2	7.98427e-05	0.00104456	7	1	1	1	1	6	1	0.000437194	1	1	1	1	1	2.06394e-05	1	1	1
ATCSLB05	2.09929e-05	1	1	7.03976e-07	1	1	1	1	1.91283e-10	1	1	1	1.73244e-05	1	1	1	1	4.13663e-09	6.87395e-07
AT1G61340	1	4.62745e-06	1	0.0195085	1	1	3.65187e-07	2	1	1.97633e-06	1	1	1	1	1	0.00649915	1	1	3.65592e-08
ELF4	8.71074e-07	1	1	5.62474e-06	1	1	1	2	1.20207e-06	1	2.98952e-08	1	1	1	1	1	1	1	1
ENODL8	0.00226462	8.43562e-05	1	0.00415142	1	1	1	8	1	1	1	1	0.000561066	1	1	7.16728e-06	1	3.80009e-07	0.00047589
BCA3	1	0.0275064	1	1	1	1	1	3	1	0.0126462	1	1	4.03895e-07	1	1	5.39213e-06	1	1.38325e-10	3.33246e-06
AT3G02800	1	4.37142e-07	1	1	1	1	1.51948e-07	1	1	9.49907e-07	1	1	1	1	1	2.38049e-05	1	1.84435e-06	1.27187e-08
ATHSFA2	1	4.21138e-08	0	1	1	1	1	3	1	3.23519e-06	0.0205514	1	1	1	1	9.3626e-06	1	1	1
CHI	1	4.24631e-05	1	1	1	1	1	1	1	7.05821e-05	1	1	1.28287e-05	1	1	0.000826084	1	6.69442e-10	6.37347e-06
CSLE1	1	1	1	0.000172855	1	1	1	1	1	1	1	1	4.15281e-05	1	1	5.43095e-05	1	1.147e-09	7.14747e-07
DIN2	1	5.95112e-07	1	0.0402152	1	1	1	1	1.44305e-09	1.05957e-06	1	1	8.96309e-08	1	0	2.67716e-07	1	5.13932e-13	0.000115554
AT5G02490	0.000361942	8.05696e-05	0	1	1	1	2.60995e-06	2	5.29427e-08	0.000485993	0.00262464	1	1	1	1	0.00023315	1	9.58182e-08	0.000233176
AT5G52750	1	2.31777e-05	1	6.84659e-07	1	1	1	1	1.75718e-06	6.50005e-06	1	1	0.0035085	1	1	0.0149888	1	5.31672e-09	2.02258e-06
AT5G51440	1	1.2104e-05	1	1	1	1	3.37859e-06	3	1	0.00014203	1	1	1	0	1	8.42037e-05	1	9.99895e-06	0.0388475
AT5G52790	0.0131123	0.000131514	1	0.000780113	1	1	1	1	9.15084e-09	1.33661e-05	1	1	0.000394918	1	1	0.00347374	1	2.5137e-08	1
BCS1	0.00224314	0.00275358	1	1.61995e-05	1	1	1	7	1	1	0.0258581	1	0.00256504	1	1	1.17236e-06	1	2.14776e-09	1.65648e-08
AT3G62550	1	1	1	1	1	1	0.000103367	1	1	1	1	1	1	1	0	1	9	1	1
AT5G39110 /// AT5G39120 /// AT5G39150 /// AT5G39180	0.000146538	1	1	1.71072e-05	1	1	1	1	1	1	1	1	6.73344e-05	1	1	1	1	3.9025e-12	2.20645e-06
AT1G51820	1	1	1	1	1	1	1	1	1	1	1	1	1	2	1	1	0	1	1
CYP710A1	1	1.82821e-06	1	1	1	1	1	4	1	1.32851e-05	1	1	1	1	1	1.18924e-05	1	1	5.61921e-05
AT4G01140	1	6.37671e-05	1	0.000346843	1	1	1	1	3.52475e-08	7.01708e-05	1	1	0.00200095	1	1	1	1	1.72225e-07	0.000650356
ZIFL1	4.81495e-05	0.000796607	1	0.000582159	1	1	1	0	1.70039e-08	0.00167499	1	1	0.00128049	1	1	1.08495e-05	1	6.99669e-07	4.00071e-06
AT4G01440	0.000181562	4.49906e-06	1	0.000266779	1	1	2.22169e-06	1	1	2.11143e-06	1	1	1	1	1	1	1	1	1
AT2G18670 /// AT2G18680	1	1.15507e-05	1	1	1	1	1	4	1	0.000220409	1	1	0.000575844	1	1	1	1	2.41818e-08	6.72645e-08
EXGT-A1	1	6.81746e-05	9	0.00289822	1	1	1	1	1	0.00584124	0.000107448	1	0.00127404	1	1	1	1	7.07987e-07	8.41553e-06
AAC3	1	3.90886e-06	1	1	1	1	1	1	6.4176e-08	4.88236e-05	1	1	0.000144064	1	1	0.000811892	1	6.5061e-06	2.6722e-05
Fes1A	0.000698085	1.18079e-06	0	1	1	1	1	8	1	3.44095e-06	1	1	1	1	1	1.25634e-05	1	1	0.000614966
WRKY33	1	0.000417185	7	1.90761e-05	1	1	1	4	1	0.000261042	1	1	1	1	1	0.000731081	1	6.93373e-06	2.15892e-08
WRKY45	1	0.00534934	1	0.00738716	1	1	1	5	5.13644e-10	0.011183	1	1	2.57811e-05	1	1	0.0107886	1	1.02595e-11	4.04415e-09
AT2G48090	1	1	1	5.50295e-07	1	1	1	1	1.02133e-09	1	1	1	8.85502e-06	1	1	0.00197414	1	1.70568e-09	1
ATSDI1	1.54658e-05	0.000393741	1	6.29567e-05	1	1	1	5	1.26821e-08	0.000697571	1	1	1.55012e-05	1	1	2.67067e-05	1	3.84306e-09	1
PIP2;4	1	0.000430003	1	0.000669094	1	1	1	4	7.35621e-10	0.00313575	1	1	0.0271829	1	1	0.00257435	1	8.02239e-10	5.78155e-06
AtPP2-A11	1	0.000339937	1	0.00103808	1	1	1	1	1	0.000326718	8.76085e-06	1	0.00152629	1	1	1	1	2.60479e-07	2.63659e-06
LAX3	1	2.98368e-06	1	1	1	1	1	1	1	1.72716e-05	1	1	0.00228959	1	1	0.000146369	1	2.97386e-06	0.0078611
WRKY75	1	1.44287e-06	1	0.00306509	1	1	1	6	2.28644e-09	5.54438e-06	1	1	6.42183e-05	1	0	0.0001359	1	4.34588e-12	7.58556e-09
AT1G72200	1	0.000328428	1	1	1	1	2.46002e-05	1	3.28486e-09	0.000442621	1	1	0.0011695	1	1	0.00781028	1	3.10406e-07	1.72857e-07
AT3G12320	2.43632e-08	1	1	1.56869e-05	1	1	1	1	1	1	8.67717e-06	1	1	1	1	1	1	1	1
AT5G04730	1	1	1	1	1	1	1	1	5.83597e-07	1	1	1	0.00026466	1	1	1	1	1.48009e-08	9.71145e-08
CYP735A2	1	0.000379706	1	0.000821415	1	1	1	1	3.30233e-07	0.000874513	1	1	0.000458933	1	1	1.19424e-05	1	2.46679e-08	1.29754e-06
ABA1	4.57236e-06	1	0	0.000156727	1	1	1	1	1	1	0.000174572	1	1	1	1	1	1	1	1
AT5G26280	1	0.000360905	1	1	1	1	1	9	4.74606e-10	1	1	1	0.0338323	1	1	1	0	1	1.51342e-05
AT5G39580	0.000574873	0.0131023	1	1	1	1	2.22025e-06	1	0.00157973	0.00223955	1	1	0.000827022	1	1	1	1	5.75215e-08	4.37675e-08
AT5G26220	1	4.43353e-07	1	1	1	1	7.54196e-05	3	1.32253e-07	2.44847e-05	1	1	1	1	1	1.82653e-08	5	1	2.36238e-05
EAP1	1	6.38643e-05	1	1	1	1	7.11386e-06	8	1	5.99667e-05	1	1	1	1	1	0.00181098	1	1.73164e-07	3.10793e-08
AT5G64510	1	4.98189e-05	1	3.4872e-05	1	1	2.27055e-06	1	5.01564e-06	0.000112769	1	1	0.00344062	1	1	0.00145049	1	1.43931e-07	6.79601e-05
HSP70	5.35073e-07	5.03566e-07	0	1	1	1	1	2	1	8.04269e-07	1	1	1	1	1	7.62137e-05	1	1	0.000848798
AT1G73480	1	6.52079e-08	7	0.000962933	1	1	2.49189e-06	1	1	4.83467e-06	0.000272182	1	0.000722107	1	1	0.00451267	1	1.1845e-06	3.76317e-05
AT3G48450	1	1.97016e-05	1	0.00160959	1	1	4.63432e-07	1	1.20347e-09	0.000896193	1	1	1	1	1	1	1	7.35406e-05	2.40503e-06
PIP1;5	1	0.00208547	1	6.14085e-05	1	1	1	1	5.565e-08	0.00631754	1	1	0.00353468	1	1	1	1	1.21496e-08	2.13398e-07
CRK11	1	0.000278869	1	3.08445e-05	1	1	1	5	7.14029e-08	0.000567984	1	1	0.000479989	1	1	0.000599855	1	1.00861e-09	2.03086e-07
CRK10	1	9.39604e-05	1	0.00124331	1	1	1	1	8.88337e-08	5.25615e-05	1	1	0.000282246	1	1	1	1	5.98736e-08	6.0708e-08
AT5G02230	0.000349607	0.00109345	1	1	1	1	4.12251e-07	1	1	0.000838878	5.53985e-05	1	0.0014998	1	1	0.000229443	1	1.28978e-06	3.10858e-07
NIA1	1	2.02912e-05	1	1	1	1	1	1	3.63022e-09	6.3955e-05	1	1	0.012806	1	1	0.000149384	1	9.26117e-07	1
AT2G40900	1	3.67004e-07	1	1	1	1	1.03718e-06	1	1	2.77416e-05	1	1	1	1	1	0.000382263	1	1	1
AT3G25790	1	8.13106e-07	1	1	1	1	0.000236035	2	9.05753e-08	8.42316e-06	1	1	0.0011605	1	1	0.00047197	1	1.09025e-05	7.61986e-06
AR781	1	0.000302472	1	1.21883e-06	1	1	1	9	1	0.000115958	1	1	0.0122271	1	1	1	1	1.45197e-07	3.6071e-09
APRR9	1.20365e-06	1	1	1.79003e-05	1	1	1	1	1	1	2.16751e-05	1	1	1	1	1	1	1	1
AT3G12510	1	1.92393e-05	1	1	1	1	0.000163439	3	7.9242e-09	0.000176041	1	1	1	1	1	2.04751e-05	1	1.89794e-08	0.00359533
NIR1	1	5.04329e-05	1	0.000209865	1	1	1	3	1	0.000469389	1	1	0.000208996	1	1	0.000120597	1	3.43454e-06	1
CYP83A1	1	5.13351e-07	1	1.31221e-05	1	1	1	1	4.94522e-08	0.00172839	1	1	0.000197222	1	1	0.000884455	1	4.11686e-09	4.31984e-07
RVE2	0.000787961	1	4	1.26005e-05	1	1	1	1	1	1	0.000271206	1	1	1	1	0.00184669	1	1	0.0100319
ACS6	0.0176473	3.12413e-05	0	1.18556e-07	1	1	1	9	1	2.58636e-05	1	1	1	1	1	1	1	7.50089e-07	8.53436e-07
AT5G14730	1	0.0197415	1	1	1	1	7.24815e-07	1	1.11705e-07	0.0445258	1	1	0.00231536	1	1	3.40483e-07	1	4.5141e-08	5.71898e-06
PAP20	1	1	1	1	1	1	1	1	1.95866e-11	1	1	1	3.99224e-06	1	1	1	1	1	1
GA3OX1	1	2.85794e-06	1	1	1	1	1	4	1	7.86377e-06	1	1	0.00510329	1	1	0.00268924	1	3.07279e-06	8.72416e-05
AT5G25450	1	1.36669e-07	1	1	1	1	3.18247e-07	7	1	7.96538e-08	1	1	1	1	1	9.16397e-06	1	1	0.00453085
AT1G76800	0.000260877	0.000404309	1	1.11977e-05	1	1	4.08657e-05	1	1.13691e-07	0.000323228	1	1	5.7507e-05	1	1	1	1	1.4523e-11	1
AT4G15420	1	9.1057e-07	1	1	1	1	1.71001e-06	1	1	0.000111645	1	1	1	1	1	6.31745e-06	1	1	0.00703669
AT3G48510	1	1	1	1	1	1	1	1	1.35379e-10	1	1	0	1	0	1	1	1	1	1
AT1G14550	1	0.00946206	1	1	1	1	2.30226e-08	0	1.79388e-07	0.0104284	1	1	0.00234494	1	1	0.0207804	1	2.74125e-05	1.1146e-09
DMP1	0.0193106	1	1	1	1	1	1	1	1	1	1	1	2.01112e-06	1	1	1	1	2.14468e-11	1.99351e-07
AT2G01900	1	7.50427e-08	1	1	1	1	1	1	3.38544e-08	2.24027e-06	1	1	1	1	1	0.00937848	1	4.07345e-07	2.65451e-07
AT3G59370	1	1	1	0.000207248	1	1	0.00352595	1	3.34235e-09	1	1	1	0.000131489	1	1	1	1	6.53395e-09	1.81147e-06
AT3G50910	1	4.28052e-05	1	1	1	1	1	2	2.70992e-08	3.13684e-05	1	1	1	1	1	0.0003444	1	1.61192e-06	1.1028e-05
AT1G12200	1	1.5958e-06	1	1	1	1	1	1	2.23647e-10	0.000639191	1	1	0.00013236	1	1	2.51315e-05	1	4.60256e-11	4.64158e-07
CKX4	1	1	1	1	1	1	1	1	1.25212e-09	1	1	1	0.000959337	1	1	1	1	2.24399e-09	4.66118e-08
ERF2	0.00218314	0.0095728	1	3.02376e-06	1	1	1	1	8.44254e-07	0.000703925	1	1	9.93179e-05	1	1	1	1	4.42984e-10	2.40439e-07
ICL	1	1	1	1	1	1	1	5	1	1	1	1	2.85805e-05	1	1	1	1	3.49931e-09	2.3966e-07
CLE6	0.00548633	7.76076e-05	1	0.0353117	1	1	1	1	7.51808e-10	0.000320947	1	1	0.000180068	1	1	0.000955463	1	4.24262e-08	0.0134717
AT1G24800 /// AT1G24881 /// AT1G25055 /// AT1G25150 /// AT1G25211	1	1.51629e-08	1	1	1	1	1	1	1	5.98087e-06	1	1	1	1	1	4.22574e-05	1	1	1
MBF1C	0.000147477	1.01137e-06	0	1	1	1	1	1	1	1.83558e-06	1	1	0.00171675	1	1	2.7756e-05	1	1	1
AT5G13200	1	0.000150524	1	1	1	1	1.90476e-07	3	1.984e-07	0.00286066	1	1	0.00847167	1	1	0.00189633	1	6.73534e-09	3.82344e-07
AT2G23270	1	3.08296e-06	1	1	1	1	4.59228e-05	5	8.64419e-09	4.24219e-06	1	1	1.47025e-05	1	1	0.000124533	1	2.43213e-10	2.67897e-07
GRX480	1	0.0242496	1	1	1	1	1	1	5.64668e-09	1	0.0449388	1	1	1	1	2.98059e-05	1	9.63198e-09	2.30585e-06
YLS9	1	1	1	0.000170344	1	1	1	0	2.26802e-08	1	1	1	1.80308e-05	1	1	0.00211449	1	6.47903e-10	7.81725e-08
NAPRT2	1	1.29575e-05	1	0.000209902	1	1	1	0	5.72462e-07	2.26031e-05	1	1	1	1	1	2.12855e-06	1	3.45559e-07	3.00671e-06
AT5G48000	1	1	1	1	0.0102436	1	1	1	1	1	1	0	1	1	1	1	1	1	1
NILR1	1	0.000121761	1	0.000954095	1	1	0.000254402	5	2.38049e-09	6.32724e-05	1	1	0.00137235	1	1	0.000249643	1	2.40037e-07	3.65699e-08
AT1G12080	1	0.000180248	1	0.00027944	1	1	1	3	1	1	1	1	9.96778e-05	1	1	1	1	1.29133e-07	1.71745e-05
AT3G46270	1	3.29206e-05	1	0.000154217	1	1	0.000164869	1	1.82116e-09	2.02412e-05	1	1	0.00218045	0	1	0.00174499	1	1	1.19e-07
CYP71B2	1	0.00032289	1	1	1	1	1	1	1.79815e-10	4.66065e-05	1.98586e-05	1	0.00551543	1	1	0.00400563	1	2.54181e-07	1.16408e-05
AT1G12030	1	4.97161e-06	1	1	1	1	1	1	1.52424e-08	2.00648e-06	1	1	0.00121041	1	0	1.82795e-07	1	6.36472e-09	1
AT2G36460	1	2.45336e-06	1	1	1	1	5.61279e-06	7	1	1.55898e-05	1	1	1	1	1	5.87708e-05	1	1	1
AT3G47540	1	3.38118e-05	1	0.00128899	1	1	1	1	6.3372e-07	0.000320159	1	1	0.00238085	1	1	0.000113589	1	3.00976e-07	6.3389e-07
AT1G72940	1	0.000314144	1	1	1	1	9.62634e-07	1	1.03977e-08	0.000225101	1	1	1	1	1	8.65204e-06	1	1.07708e-07	8.96583e-07
PGPS1	1	5.87951e-05	3	0.000144416	1	1	1.89554e-06	4	1	0.000192788	1	1	1	1	1	0.000436422	1	2.37095e-07	3.37083e-09
AGP4	1	1	1	0.00167473	1	1	1	2	5.05745e-10	1	1	1	0.00164826	1	1	1	1	1.68294e-07	4.20627e-05
AT4G31910	1	6.3852e-08	1	0.000333286	1	1	0.000207104	7	1	9.74988e-07	1	1	1	1	1	0.000655664	1	1	0.00025684
AT1G72900	1	4.70318e-06	2	0.000830255	1	1	1	1	1	1.83128e-05	1	1	0.000736903	1	1	8.10923e-06	1	9.21073e-11	7.36915e-07
AT5G06760	1	1	1	1	1	1	1	1	1.50672e-10	1	1	1	1	3	1	1	0	1	1
AT5G06730	1	1	1	1.91699e-07	0.00217123	1	1	1	4.12821e-11	1	1	1	3.66601e-05	1	1	1	1	3.9612e-12	8.2947e-08
AT1G33340	0.0153491	0.000111257	4	0.000394028	1	1	1	1	1	9.61731e-05	0.000394641	1	0.00400886	1	1	1	1	1	1
AT1G35910	1.67324e-06	1	1	4.96969e-05	1	1	0.000236153	1	2.18013e-06	1	1	1	1.15131e-05	1	1	1	1	2.26172e-10	9.99266e-08
AT3G12900	0.00138932	1	1	0.0445508	1	1	1	1	1	1	1	0	1	0	1	1	1	0.000271689	1.15907e-06
AT4G28350	1	4.38422e-08	1	1	1	1	5.28419e-05	1	8.91345e-07	4.95313e-07	1	1	1	1	1	0.000676974	1	1	5.65281e-08
ATGSTF6	1	0.000129013	1	8.06568e-05	1	1	1	4	3.32707e-10	0.000334522	1	1	0.0292612	1	1	8.54908e-06	1	7.07979e-09	2.0342e-05
AT4G04330	1	1	1	1	1	1	1	1	1	1	1	1	1	4	1	1	2	1	1
ATERF6	1	0.000103464	1	5.37034e-05	1	1	1	3	1	5.14106e-05	1	1	1	1	0	0.0329836	1	1	5.0551e-08
AT3G09405	1	6.35663e-05	1	1	1	1	5.29206e-05	1	4.71442e-08	0.00021197	1	1	1	1	1	8.20941e-05	1	1.54573e-06	1.24974e-07
AT3G09440	0.000118495	1.40796e-06	0	1	1	1	1	1	1	9.34664e-06	0.017036	1	1	1	1	5.86965e-06	1	8.4159e-07	1
ATBCB	1	3.12883e-05	1	0.0387375	1	1	1	1	9.43356e-10	7.22465e-06	1	1	1	1	1	1	1	8.21765e-08	8.44944e-08
ATGSTU4	1	2.57516e-06	1	1	1	1	1	1	1	3.33216e-05	1	1	0.00093939	1	1	1.54168e-09	1	4.06104e-10	1.98891e-07
CYP706A2	1	3.52635e-06	1	7.93397e-05	1	1	1	1	1.9817e-05	1.71527e-06	1	1	1	1	1	0.000885237	1	1.37657e-08	2.28609e-08
ORG1	1	1	9	1	1	1	1	1	1	1	2.34483e-05	1	1.1091e-05	1	1	1	1	5.5971e-08	0.00101493
AT1G22500	1	9.45812e-05	1	1	1	1	0.00340604	8	8.50372e-09	0.00019266	0.00254692	1	0.000449883	1	1	0.000102066	1	2.29556e-07	1.46111e-07
AT4G16260	1	0.000227208	1	2.90027e-05	1	1	1	2	7.62231e-09	0.0008918	0.0217452	1	0.000553958	1	1	1	1	1.37895e-08	0.000682917
AT2G35730	1	6.22157e-06	1	1	0.0379382	1	0.000237356	6	1	0.000646484	1	1	0.000255208	1	1	0.00238256	1	3.61219e-08	6.79523e-05
COL9	2.32291e-06	1	1	6.66432e-07	1	1	1	1	1	1	9.31218e-05	1	1	1	1	1	1	1	1
UCC1	0.00360227	1	1	0.00063444	1	1	1	1	9.68906e-09	1	1	1	0.00255502	1	1	1	1	1.03194e-07	0.00678513
AT1G60750	1	4.4548e-05	1	1	1	1	4.30554e-06	7	1.54907e-07	0.000101281	1	0	1	1	1	1.9659e-06	1	1	7.91502e-07
AT5G05220	1	8.22507e-07	1	1	1	1	1.88072e-07	4	1	1	1	1	1	1	0	1	1	1	0.0141101
AIR1	1	1	1	1	1	1	1	1	3.60821e-07	1	1	1	0.00014484	1	1	1	1	4.43271e-08	2.48452e-09
AT5G20820	0.000142218	1	1	1.28492e-06	1	1	1	1	4.72017e-06	0.00111785	1	1	6.63769e-06	1	1	9.01965e-09	1	9.21179e-10	1
AT3G23880	0.000106902	0.0076457	1	1	1	1	1	1	4.31562e-09	0.00733664	1	1	1	1	1	0.000315319	1	1	0.00363583
GLIP1	1	0.042404	1	1	1	1	1	9	4.00566e-10	1	1	1	0.00085647	1	1	1	1	2.56662e-11	1.38402e-07
CYP81F2	0.0270832	0.000366603	1	2.72818e-07	1	1	1	1	2.90347e-09	0.000166195	1	1	0.00241088	1	1	0.000400463	1	5.49374e-09	3.80478e-06
CYP81D8	1	3.17455e-05	1	3.71726e-06	1	1	1	3	1.94736e-08	3.01899e-05	1	1	0.000434107	1	1	1.98658e-06	1	5.94936e-07	1.59434e-07
HSP17.4	0.0224483	8.0264e-05	1	1	1	1	1	6	1	6.14137e-05	1	1	1	1	1	0.000141412	1	1	1.78948e-08
AT5G05340	1	1	1	0.000526343	1	1	1	1	4.95319e-09	1	1	1	1.965e-05	1	0	1	1	5.28054e-12	1.93682e-06
AT5G19970	1	6.25422e-05	1	1	1	1	4.44695e-05	1	3.34033e-08	0.000121728	1	1	0.000172062	1	1	0.000413081	1	4.37158e-08	5.47836e-09
AT1G21440	0.000260364	0.00227571	1	4.68227e-06	1	1	1	1	4.48456e-07	0.000220748	1	1	0.00178361	1	1	1	1	3.63472e-08	3.23826e-05
AT3G19030	1	3.77869e-06	1	0.000563381	1	1	3.39575e-05	2	3.58791e-07	2.20847e-05	1	1	0.00203905	1	1	0.000201716	1	1	0.000133033
AT3G20015	1	7.44347e-05	1	1	1	1	1.91804e-07	1	1	0.000591927	1	1	1	1	1	5.52577e-06	1	1	1
AT5G06610	9.71523e-05	1.80774e-05	1	7.91266e-05	1	1	1	1	1	5.29776e-06	1	1	1	1	1	0.0002105	1	1	0.00815878
AT5G20910	1	2.74535e-07	1	1	1	1	1	4	1	9.22871e-05	1	1	1	1	1	2.0783e-06	1	1	9.63954e-06
AT1G09750	1	0.000485932	1	0.0342642	1	1	1	5	1	0.00219585	1	1	0.00797386	1	1	0.00127395	1	1.03249e-07	0.000165532
AT4G28460	1	7.95844e-06	1	1	1	1	1.42188e-05	3	4.00235e-08	0.000134508	1	1	0.00184008	1	1	0.000433355	1	1.70131e-09	1.1807e-06
LCR69	0.000104084	0.000242815	1	0.000103586	1	1	1	1	1	3.8019e-06	0.00191024	1	1	1	1	1	1	1	1
CYP93D1	1	1	1	1	1	1	1	1	2.61524e-09	1	1	1	2.25214e-05	1	1	1	1	1.5598e-11	1
SBT3.5	1	0.00014502	1	1	1	1	1	6	1	0.00125648	1	1	0.00238099	1	1	3.92072e-05	1	4.9306e-08	2.91392e-06
AT4G39070	2.46523e-05	1	1	4.51194e-05	1	1	1	9	2.00536e-06	0.0307842	1	0	1	1	1	1	1	1	1
AT4G15120	1	5.57685e-08	1	6.2887e-05	1	1	4.05145e-07	1	2.35868e-08	1.78356e-06	1	1	0.000102201	1	1	1.03469e-05	1	6.92531e-06	7.85569e-08
AT4G16447	1	1.47869e-05	1	0.000297381	1	1	2.53817e-05	4	4.93858e-09	1.74561e-05	0.000822117	1	1	1	1	1	1	1	1
AT4G40070	1	3.17562e-06	1	1	1	1	1	1	1.29692e-08	5.63891e-05	1	1	0.000272475	1	1	3.1005e-06	0	6.12993e-06	9.13094e-05
AT3G32040	1	1.22406e-05	1	1	1	1	0.000129254	3	2.56923e-08	6.46859e-06	1	1	0.00289162	1	1	1	1	7.95147e-06	0.00126108
AT3G07090	0.000122646	7.21139e-07	0	1	1	1	1	3	1	2.4476e-05	1	1	1	1	1	2.66038e-06	1	1	1
AT5G42830	1	0.0228234	1	1	1	1	1	1	1.25102e-06	0.00904367	1	1	0.00022021	1	1	0.000122417	1	1.71148e-09	2.04579e-06
AT2G19310	0.000375174	1.19803e-07	0	1	1	1	1.88391e-06	5	1	3.11028e-06	1	1	1	1	1	0.000111007	1	1	1
AT5G42860	1	7.09075e-06	1	1	1	1	1	2	1	1.52907e-05	1	1	0.000897935	1	1	1	1	1.15701e-05	0.000631134
AT2G21640	1	8.08269e-06	1	1	1	1	0.00179228	1	1	3.77232e-05	1	1	1.657e-05	1	1	3.1746e-05	1	0.000155695	1
AT1G71140	1	1	1	1	1	1	1	1	3.69671e-11	1	1	1	2.51722e-05	1	1	1	1	3.58884e-10	1.98499e-05
AT4G19810	0.00485178	0.0281774	1	0.00220132	1	1	1	1	5.4346e-11	0.0117767	1	1	1.62598e-05	1	1	0.0111294	1	7.47129e-11	1
MOT1	0.00341069	1	1	1.37699e-05	1	1	1	1	4.33345e-10	1	1	1	3.46931e-05	1	1	0.00511554	1	1.12895e-05	3.73316e-06
AT5G64170	2.88342e-07	0.000104618	1	0.000370639	1	1	1	0	1	0.000167188	2.13764e-06	1	1	1	1	1	1	1	1
AT1G61740	5.75059e-06	7.30142e-07	4	0.000280464	1	1	1	1	7.1575e-07	8.93672e-07	1	1	1	1	1	0.000448095	1	1	1
ATHSP23.6-MITO	1	3.9889e-07	1	1	1	1	1	2	1	8.14143e-06	1	1	1	1	1	3.25395e-07	1	1	0.0250675
