# Supplementary material for: Integrated bioinformatics analysis of As, Au, Cd, Pb and Cu heavy metal responsive marker genes through Arabidopsis thaliana GEO datasets
Source: PeerJ. 2019 Mar 18;7:e6495. doi: 10.7717/peerj.6495 (PMC6428040; doi:10.7717/peerj.6495)
Supplement: Table S8 [file peerj-07-6495-s008.xlsx]

## Sheet: Sheet1
TABLE S7 Topological features of all nodes in the PPI network of DEGs.
Name	Degree	Closeness	Betweenness
NILR1	33	0.550562	0.387277
PGPS1	29	0.466667	0.105491
WRKY33	27	0.462264	0.0498541
BCS1	25	0.466667	0.0712996
AR781	22	0.403292	0.00981765
NR1	21	0.47343	0.213352
CYP81D8	21	0.466667	0.0575818
EAP1	20	0.403292	0.0187092
MYB15	20	0.441441	0.0229295
CYP81F2	18	0.457944	0.044371
AT5G52750	17	0.426087	0.00962603
MYB51	17	0.433628	0.0289143
BCB	16	0.398374	0.0154764
ACS6	15	0.406639	0.0510591
AT4G28460	15	0.426087	0.0346772
CRK11	15	0.422414	0.015042
HSP70	15	0.410042	0.0594125
AT1G72900	14	0.390438	0.00140173
HSFA2	14	0.388889	0.0356864
AT3G07090	13	0.322368	0.00166243
AT3G09440	13	0.415254	0.0345731
Fes1A	13	0.322368	0.00166243
GRX480	13	0.381323	0.00453428
Hsp70-2	13	0.439462	0.058672
YLS9	13	0.424242	0.0313738
AT5G51440	12	0.321311	0.00103566
ERF6	12	0.374046	0.00086833
HSP23.6	12	0.321311	0.00104885
AT1G72940	11	0.371212	0.00022752
AT2G19310	11	0.320261	0.00047469
CYP706A2	11	0.429825	0.0117143
ERF2	11	0.371212	0.0007252
HSP17.4	11	0.320261	0.00047469
MBF1C	11	0.30625	0.00029771
WRKY75	11	0.415254	0.031363
AT5G25450	10	0.299694	0.00014026
FBS1	10	0.367041	0.00192512
PFA-DSP3	10	0.371212	0.00110111
AT5G42830	9	0.403292	0.0613057
GSTF6	8	0.426087	0.0276022
ABA1	7	0.371212	0.0499391
AT4G39830	7	0.410042	0.00545749
CEJ1	7	0.337931	0.00139002
SBT3.5	7	0.395161	0.00706147
AT4G15420	6	0.296073	0
AT4G37290	6	0.35	0.00365476
BCAT4	6	0.333333	0.0159157
CHI	6	0.362963	0.0410921
CYP83A1	6	0.398374	0.037376
TIN1	6	0.296073	0
AT5G64170	5	0.278409	0.00911354
CYP710A1	5	0.390438	0.00366118
GSTU4	5	0.378378	0.00011847
PRR9	5	0.333333	0.061686
AT1G51820	4	0.335616	0
AT5G02230	4	0.334471	0
CRK10	4	0.334471	0
AT2G21640	3	0.333333	0.0204082
AT3G12320	3	0.276056	0.00023376
AT3G59370	3	0.272222	0.0403955
AT5G04730	3	0.364312	0.0283042
AT5G39580	3	0.333333	1.913e-05
ATCSLB05	3	0.367041	0.0797391
CKX4	3	0.319218	0.00308237
CYP71B2	3	0.381323	0.0038874
CYP735A2	3	0.379845	0.00939155
ELF4	3	0.256545	0.0204082
SULTR1;1	3	0.28	0.0207237
TAT7	3	0.284058	0.00209955
AIR1	2	0.289941	0.0204082
AT1G12030	2	0.75	0.666667
AT1G12080	2	0.214912	0
AT1G21440	2	0.290801	0
AT1G72060	2	0.308176	0
AT1G73480	2	0.255208	0
AT2G23270	2	0.304348	0
AT4G15120	2	0.214912	0
AT5G13200	2	0.320261	0
ATSDI1	2	0.75	0.666667
BCA3	2	0.327759	0.0117757
BT2	2	0.327759	0
ChiC	2	0.268493	0.0204082
CYP708A2	2	0.374046	0
CYP93D1	2	0.374046	0
FMO	2	0.290801	0
GA3OX1	2	0.331081	0
ORG1	2	0.360294	0
AGP4	1	1	0
AT1G66690	1	0.319218	0
AT1G72200	1	0.250639	0
AT2G18680	1	0.356364	0
AT3G12900	1	0.5	0
AT3G47540	1	0.212121	0
AT3G62550	1	1	0
AT4G16447	1	1	0
AT4G28350	1	0.319218	0
AT5G26220	1	0.5	0
AT5G52790	1	0.225287	0
COL9	1	0.204593	0
DMP1	1	0.29878	0
ENODL8	1	1	0
GLIP1	1	0.288235	0
ICL	1	0.322368	0
MOT1	1	0.219239	0
NIR1	1	0.322368	0
PAP20	1	1	0
PIP2;4	1	0.269231	0
RbcX1	1	1	0
TPPD	1	1	0
UCC1	1	1	0
WRKY45	1	0.294294	0
